# Supplementary material for: Hydrophobic pore gates regulate ion permeation in polycystic kidney disease 2 and 2L1 channels
Source: PubMed Central journal article supplement (PMC5998024; doi:10.1038/s41467-018-04586-x), 2018-06-13
Supplement: 41467_2018_4586_MOESM1_ESM.pdf [file 41467_2018_4586_MOESM1_ESM.pdf]

Supplementary Information

Hydrophobic pore gates regulate ion permeation in polycystic kidney disease 2 and 2L1 channels

Zheng et al.

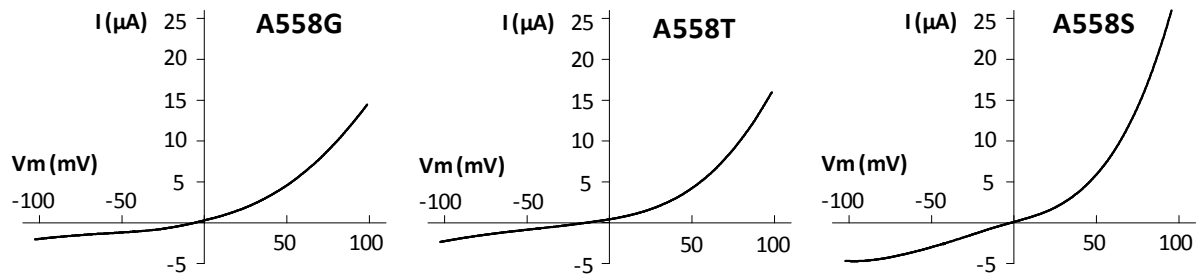

**Supplementary Figure 1. Representative I-V curves for PKD2L1 A558G, A558T and A558S mutants.** Currents were recorded in expressing oocytes in the presence of the  $Mg^{2+}$ -free Na-containing solution (in mM): 100 NaCl, 2 KCl, 10 HEPES at pH 7.5.

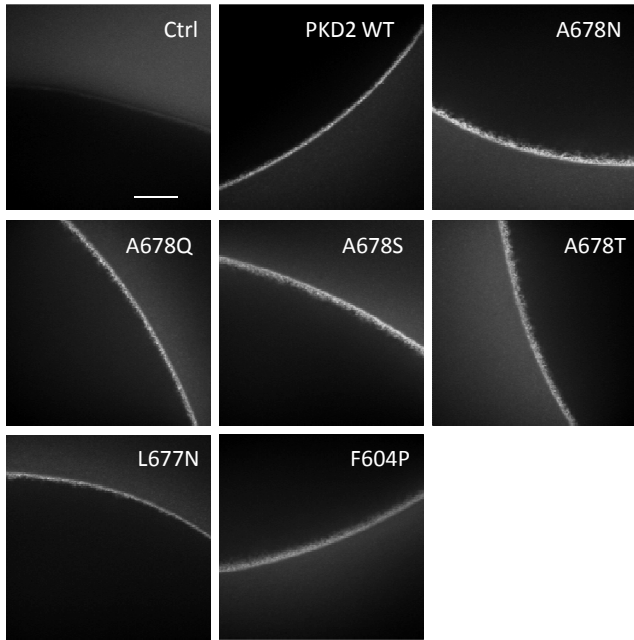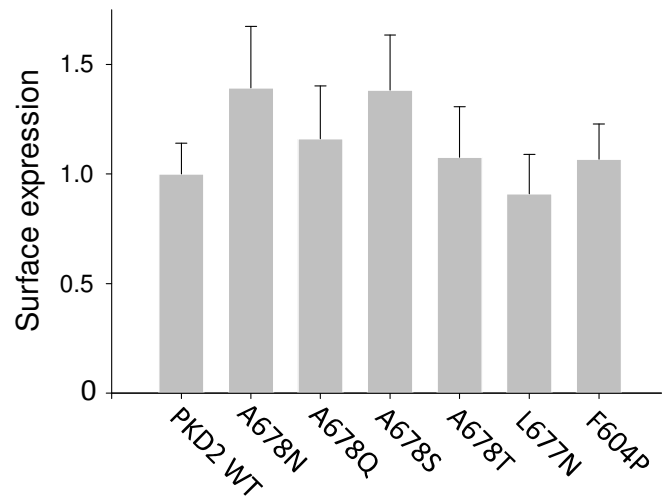

**Supplementary Figure 2. Surface expression of WT or mutant PKD2 in oocytes.** Left panel, whole-mount immunofluorescence using the antibody for the HA-tag showing the oocyte surface expression of the PKD2 WT or indicated mutants; Ctrl, water injected oocytes. Scale bar, 50  $\mu$ m. Right panel, averaged surface membrane expression of the PKD2 mutants normalized to that of PKD2 WT (n = 4 - 7). Data are presented as mean  $\pm$  SEM.

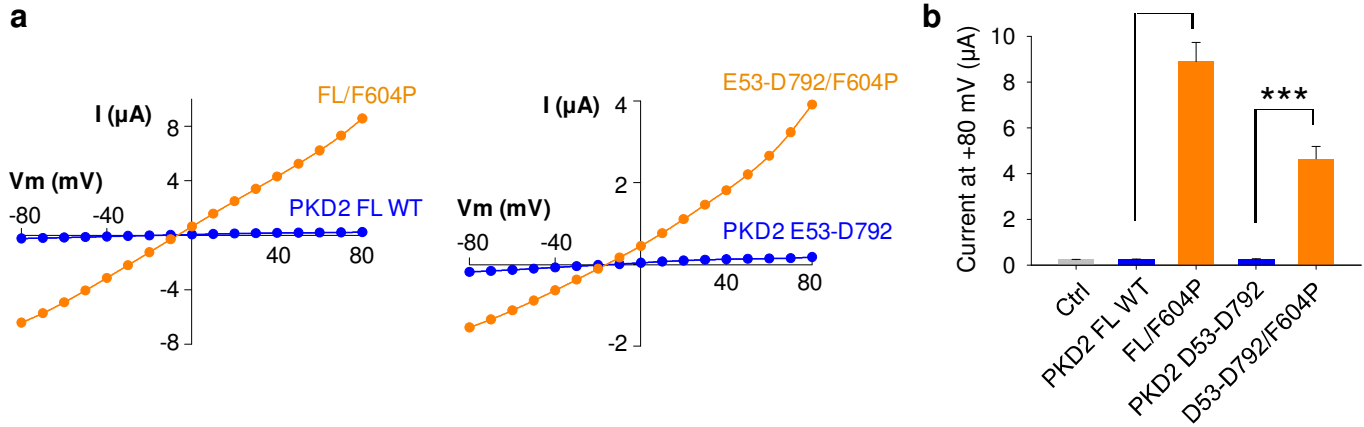

**Supplementary Figure 3. Characterization of human PKD2 truncated mutant E53-D792. a**

Representative I-V curves of full-length (FL) wild-type (WT) PKD2 and truncated mutant E53-D792 without or with F604P point mutation obtained under the same experimental condition as in Fig. 3a. **b**

Averaged currents at +80 mV in expressing or water-injected (Ctrl) oocytes, as indicated. Data are presented as mean  $\pm$  SEM. \*\*\*P < 0.001 by Student's t-test.

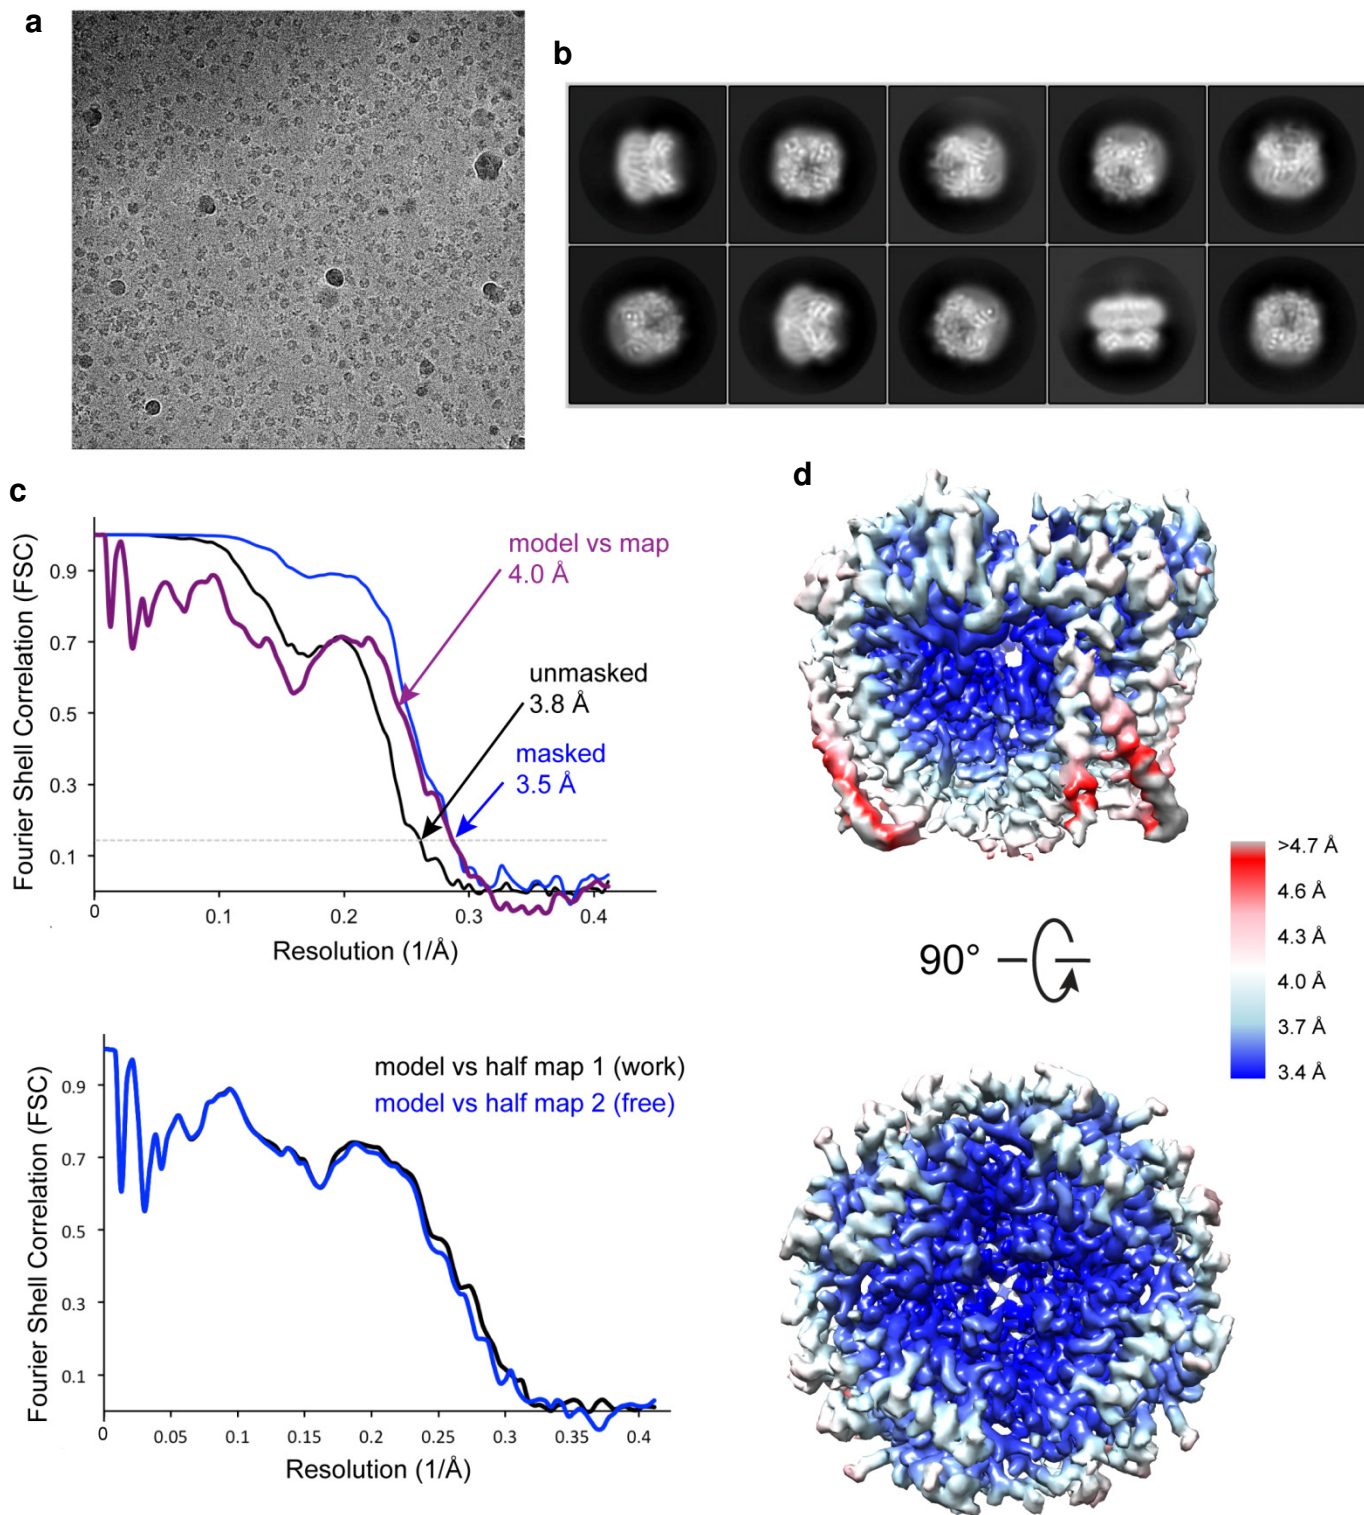

**Supplementary Figure 4. Structure determination of the PKD2 F604P channel.** **a** A representative micrograph of PKD2 F604P particles recorded on a TF30 Polara microscope. **b** 2D classes of PKD2 F604P calculated with RELION. **c** FSC curves for resolution estimation and model validation. (top) FSC curves reported by RELION before (unmasked, black) and after (masked, blue) postprocessing, where an automask was generated by RELION to flattening regions outside protein density prior to FSC calculation. FSC curves (model vs summed half map, purple) show overall agreement between model and map. (bottom) FSC curves are calculated for model vs half map 1 (work, black) and model versus half map 2 (free, blue). Overall agreement between these curves indicates little over-fitting of the model. **d** Local resolution determined by RELION.

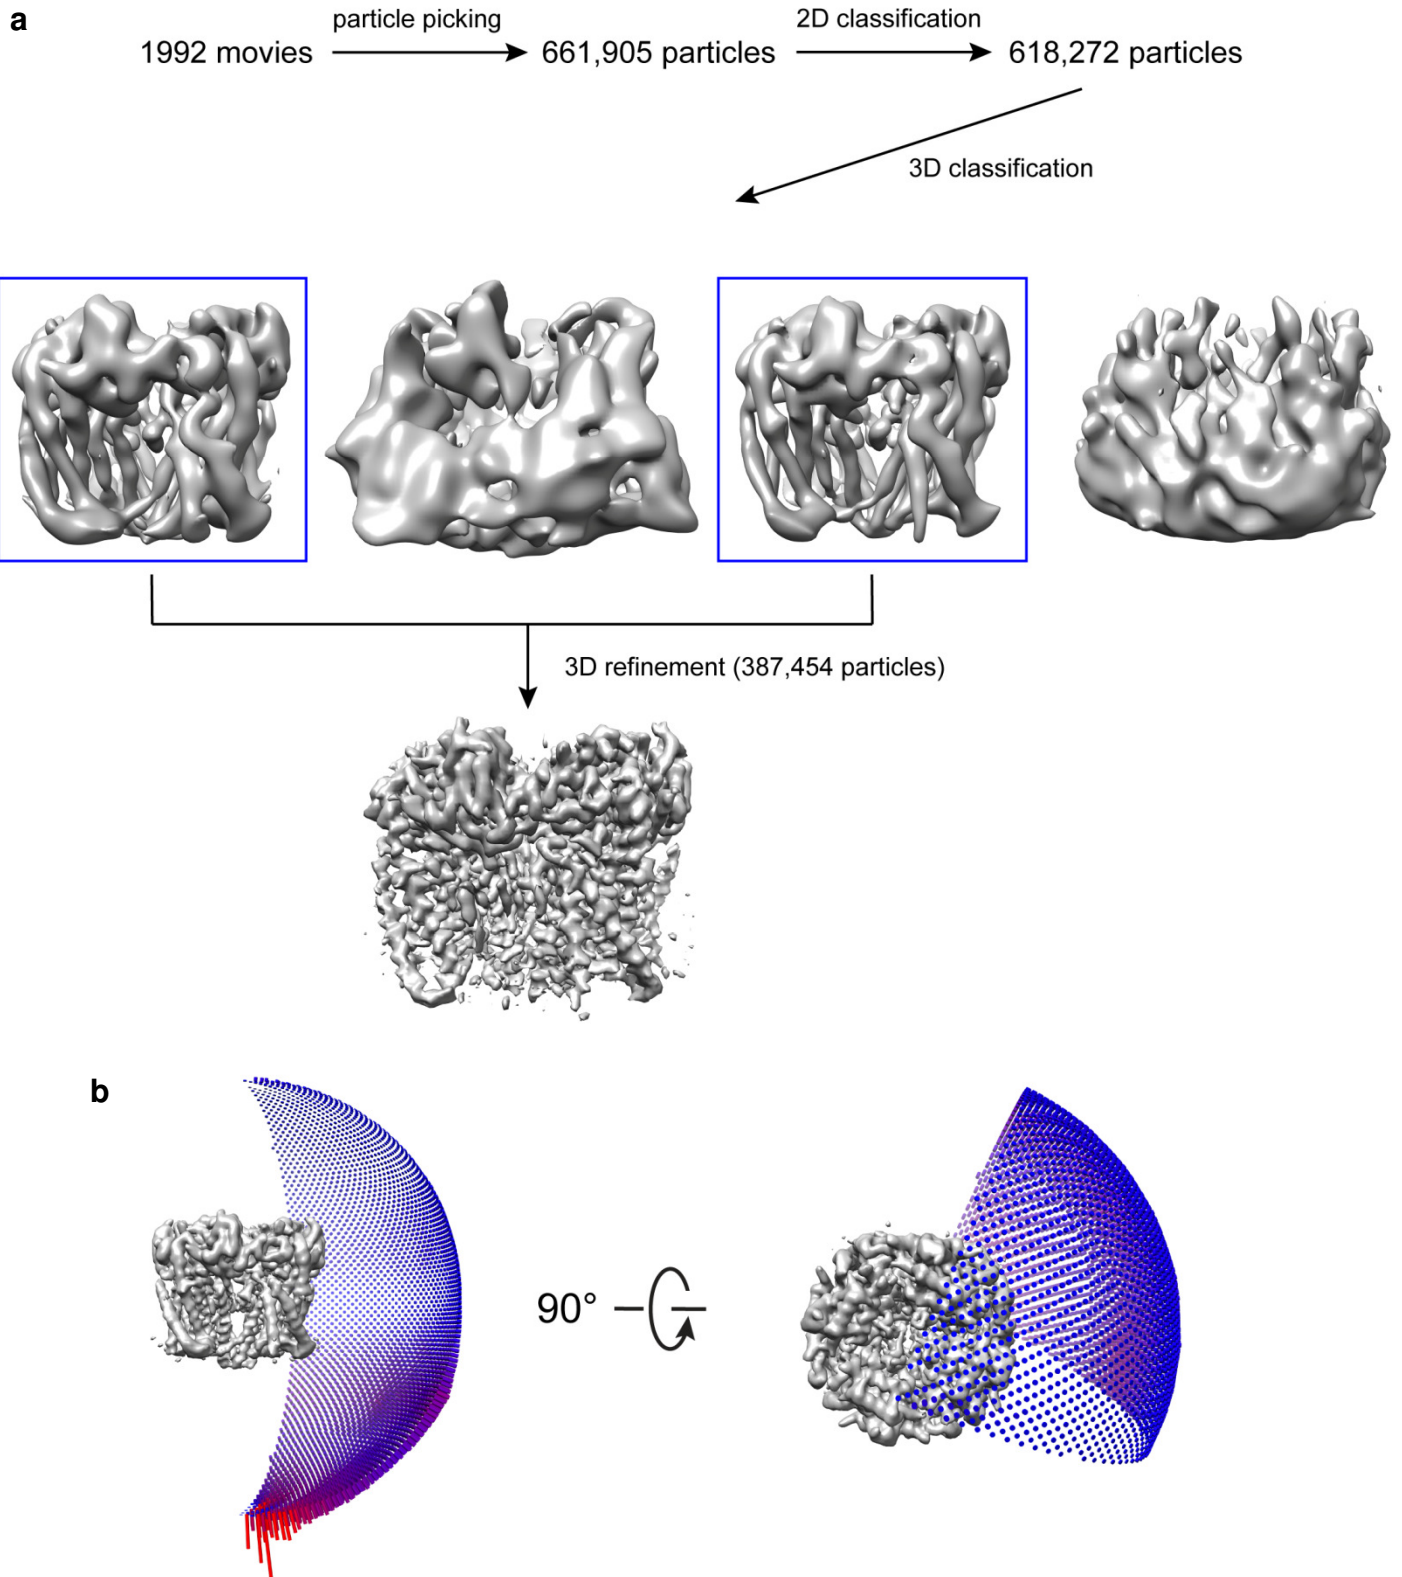

**Supplementary Figure 5. Reconstruction of the PKD2 F604P channel with C4 symmetry. a** Flow chart of image processing for the PKD2 F604P channel with C4 symmetry imposed. **b** Angular distribution plot of all particles projections. Cylinder heights are proportional to number of particles assigned to each set of Euler angles.

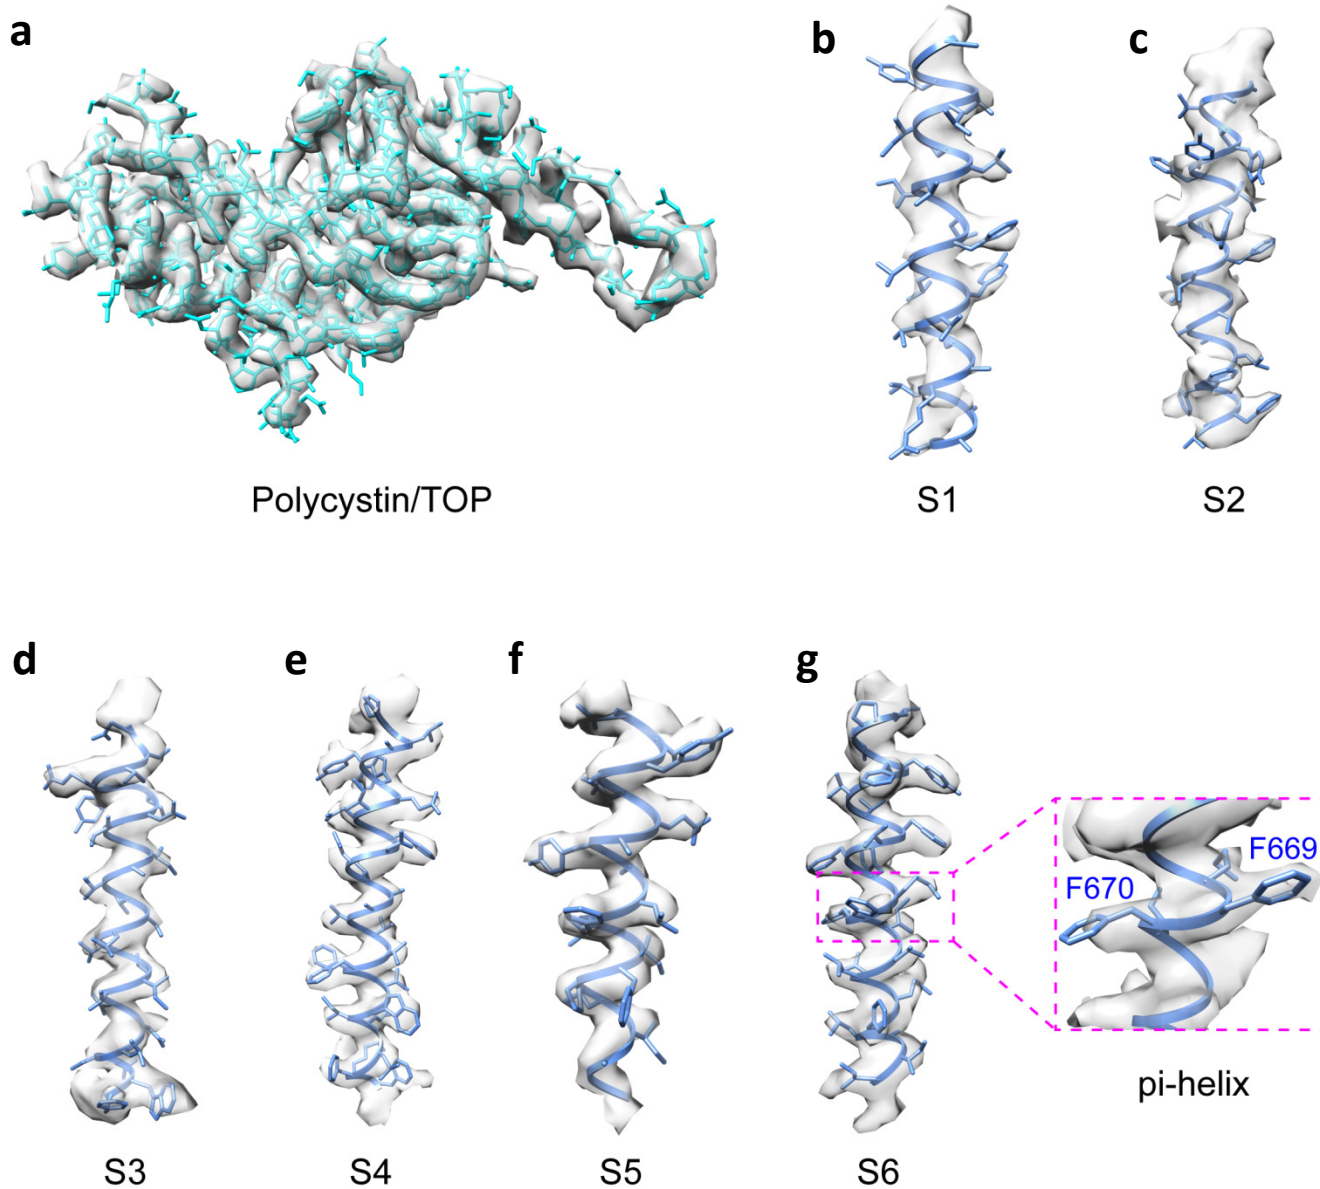

**Supplementary Figure 6. EM density maps of various regions of the PKD2 F604P channel.** The maps are sharpened with a b factor of  $-150 \text{ \AA}^2$ . In panel G, the pi-helix is highlighted.

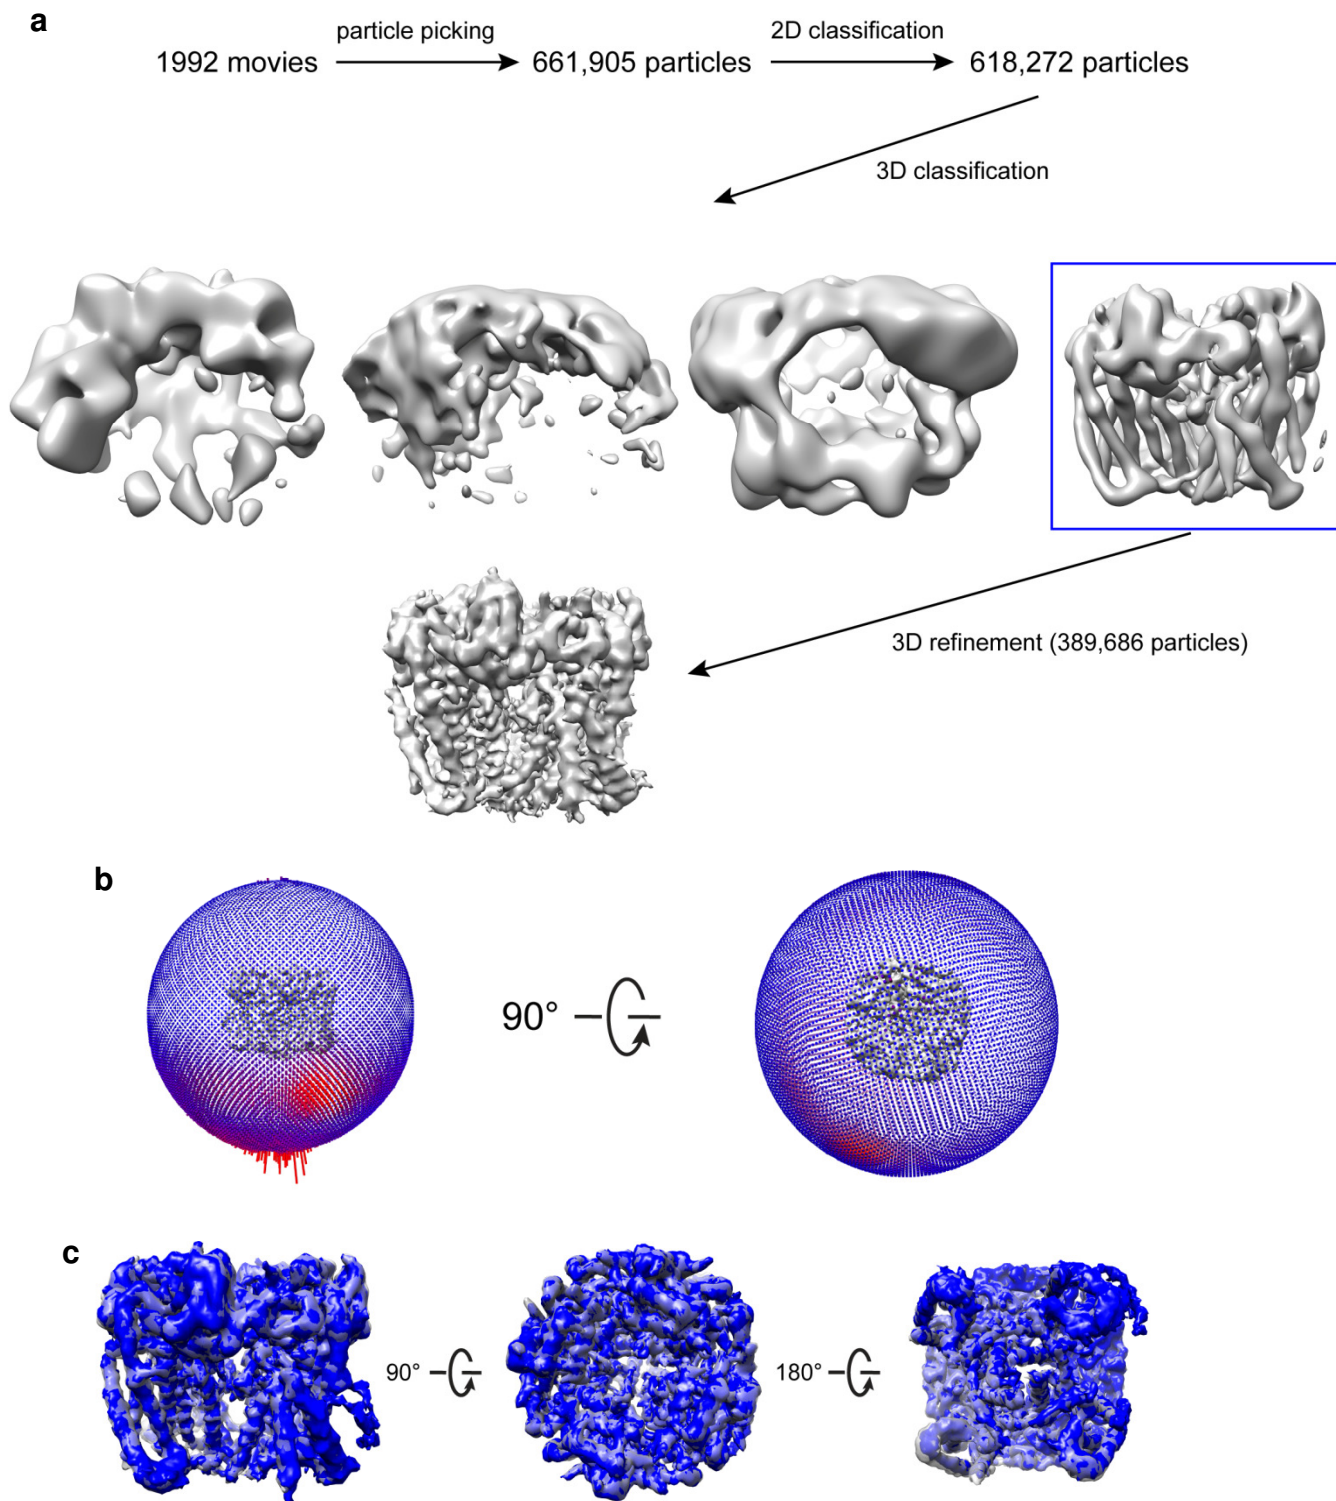

**Supplementary Figure 7. Reconstruction of the PKD2 F604P channel without C4 symmetry. a** Flow chart of image processing for the PKD2 F604P channel without C4 symmetry imposed. **b** Angular distribution plot of all particles projections. Cylinder heights are proportional to number of particles assigned to each set of Euler angles. **c** Comparison of the maps reconstructed with (gray) or without (blue) C4 symmetry, showing their overall agreement. Only subtle differences within the peripheral S1 helix, flexible loops, and amphipols are observed. Overall, map determined without C4 symmetry is of lower resolution as compared with the map determined with C4 symmetry. In particular, the S4-S5 linker is not well resolved in the map without imposing C4 symmetry.



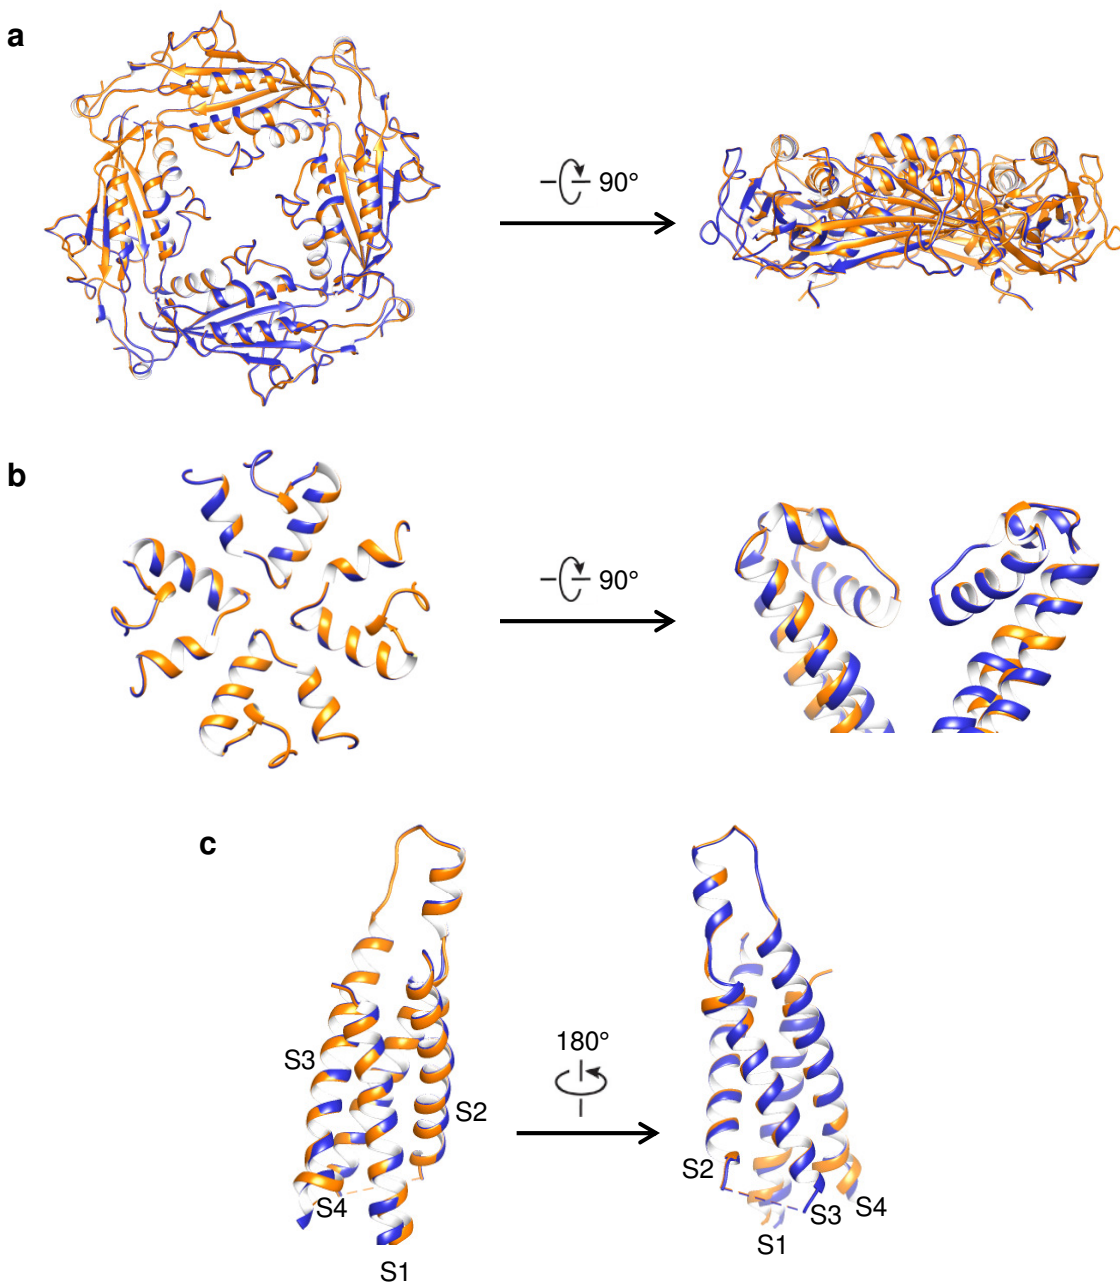

**Supplementary Figure 8. Superposition of PKD2 WT and F604P mutant structures.** Superposition of TOP domains (a), selectivity filters (b) and S1-S4 helices (c). PKD2 WT, blue; F604P, orange.

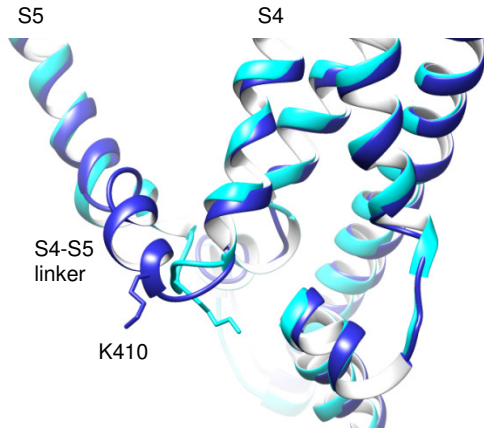

**Supplementary Figure 9. Comparison between the TRPML1 S4-S5 linker in the closed (blue, PDB: 5WPQ) and proposed pre-open (cyan, PDB: 5WPT) states. The K410 in the linker's N-terminus, corresponding to the R581 in PKD2, is indicated.**

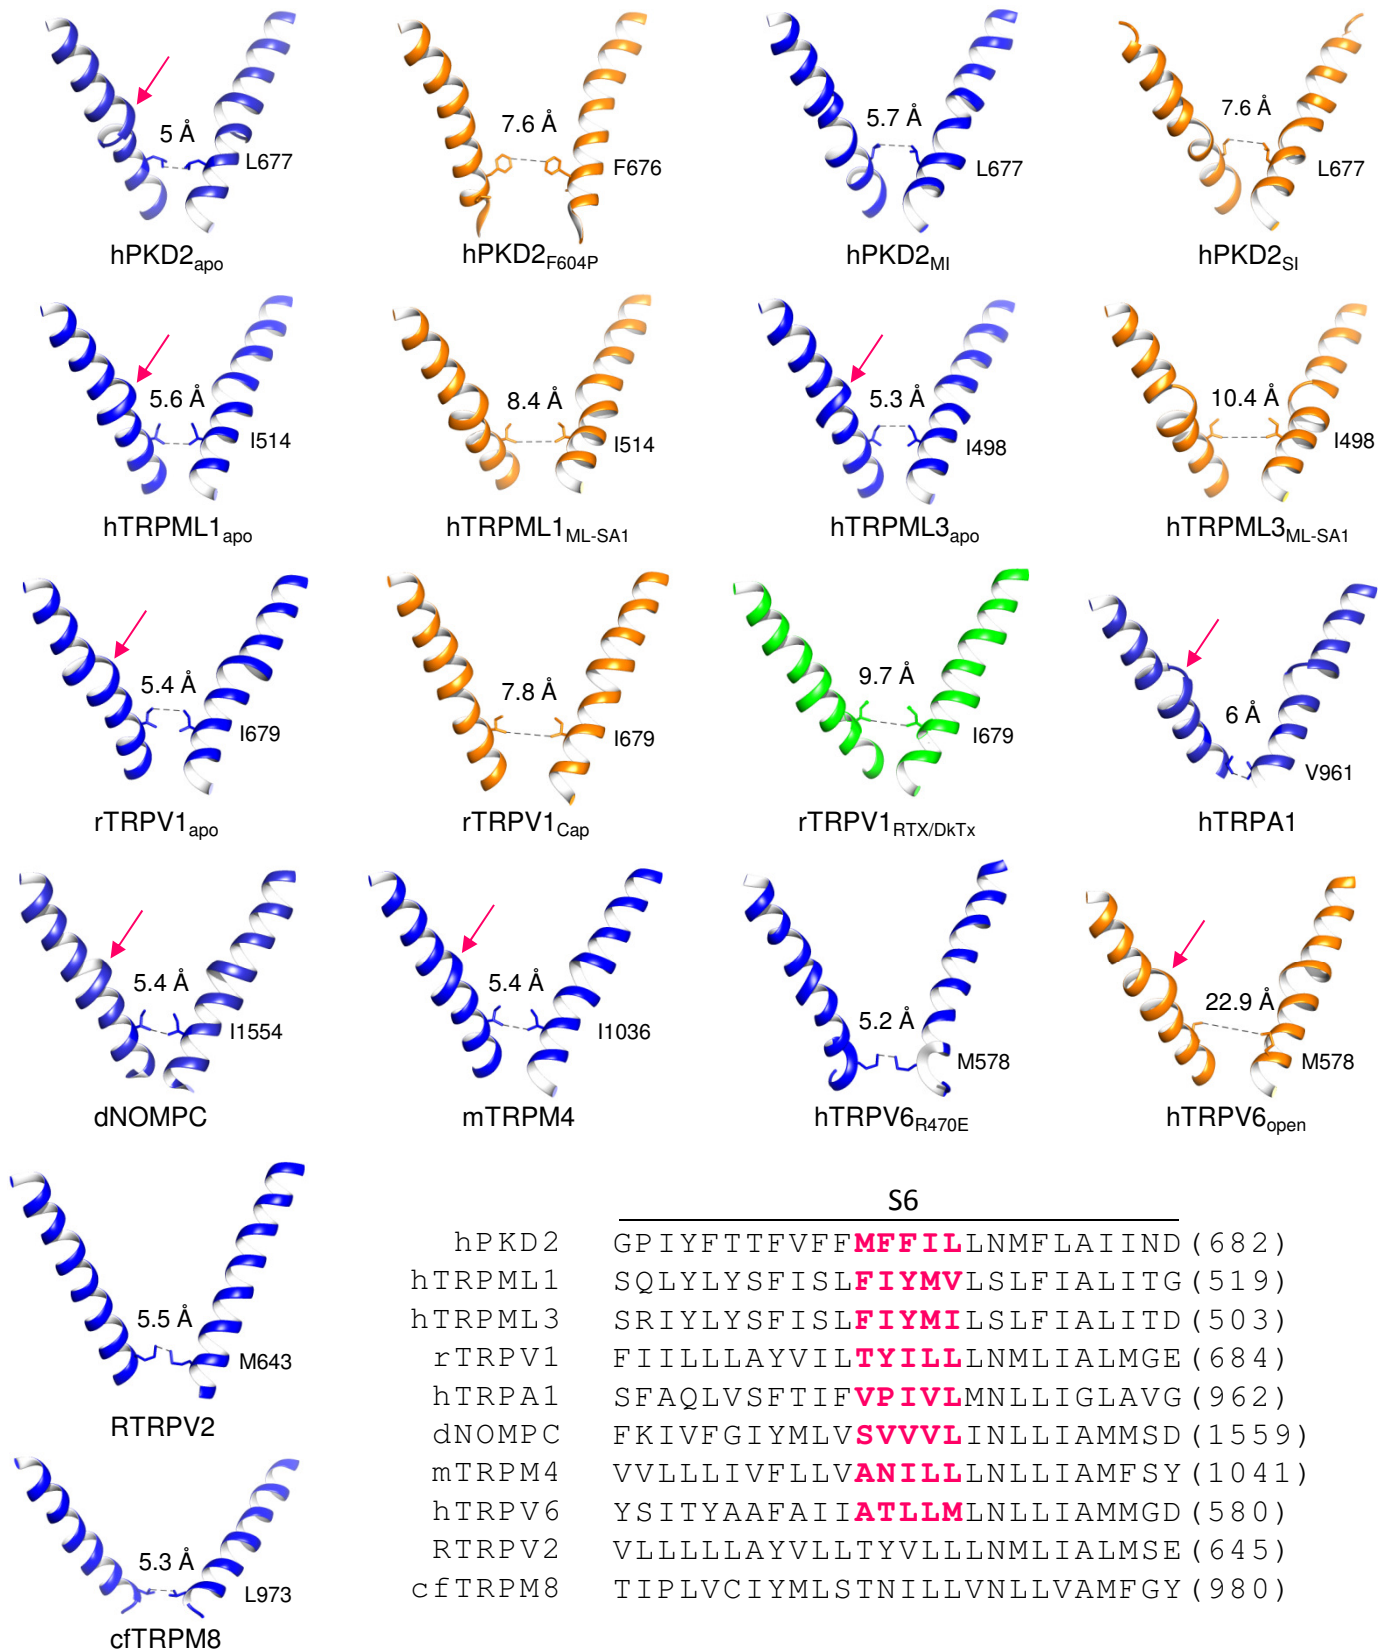

**Supplementary Figure 10.  $\pi$ -helix and  $\alpha$ -helix in S6 of TRP channels.** Upper and lower left panel, pore-lining S6 helices in hPKD2<sub>apo</sub> (apo state, PDB: 5T4D), hPKD2<sub>MI</sub> (bound with multiple Ca<sup>2+</sup> ions, PDB: 5MKF), hPKD2<sub>SI</sub> (bound with single Ca<sup>2+</sup> ion, PDB: 5MKE), hTRPML1<sub>apo</sub> (PDB: 5WJ5), hTRPML1<sub>ML-SA1</sub> (bound with agonist ML-SA1, PDB: 5WJ9), hTRPML3<sub>apo</sub> (PDB: 6AYE), hTRPML3<sub>ML-SA1</sub> (bound with ML-SA1, PDB: 6AYF), rTRPV1<sub>apo</sub> (PDB: 3J5P), rTRPV1<sub>Cap</sub> (bound with capsaicin, PDB: 3J5R), rTRPV1<sub>RTX/DkTx</sub> (bound with RTX/DkTx, PDB: 3J5Q), hTRPA1 (PDB: 3J9P), dNOMPC (PDB: 5VKQ), mTRPM4 (PDB: 6BCJ), hTRPV6<sub>R470E</sub> (full-length human TRPV6 with the R470E mutation, PDB: 6BOA), hTRPV6<sub>open</sub> (full-length human TRPV6, PDB: 6BO9), RTRPV2 (PDB: 5AN8), cfTRPM8 (PDB: 6BPQ). The gate residues revealed by the structures are shown and the pore diameters determined by the gate residues indicated. The  $\pi$ -helix in the middle of S6 is indicated by a red arrow. h, human; r, rat; d, *drosophila* (fruit fly); m, mouse; R, rabbit; cf, collared flycatcher. Lower right panel, amino acid sequence alignment of S6 helices from hPKD2 (Universal Protein Resource accession #: Q13563), hTRPML1 (Q9GZU1), hTRPML3 (Q8TDD5), rTRPV1 (O35433), hTRPA1 (O75762), dNOMPC (Q7KIQ2), mTRPM4 (Q7TN37), hTRPV6 (Q9H1D0), RTRPV2 (G1SNM3), cfTRPM8 (U3JD03). The last amino acid numbers are indicated and the  $\pi$ -helix sequences are highlighted bold and magenta.

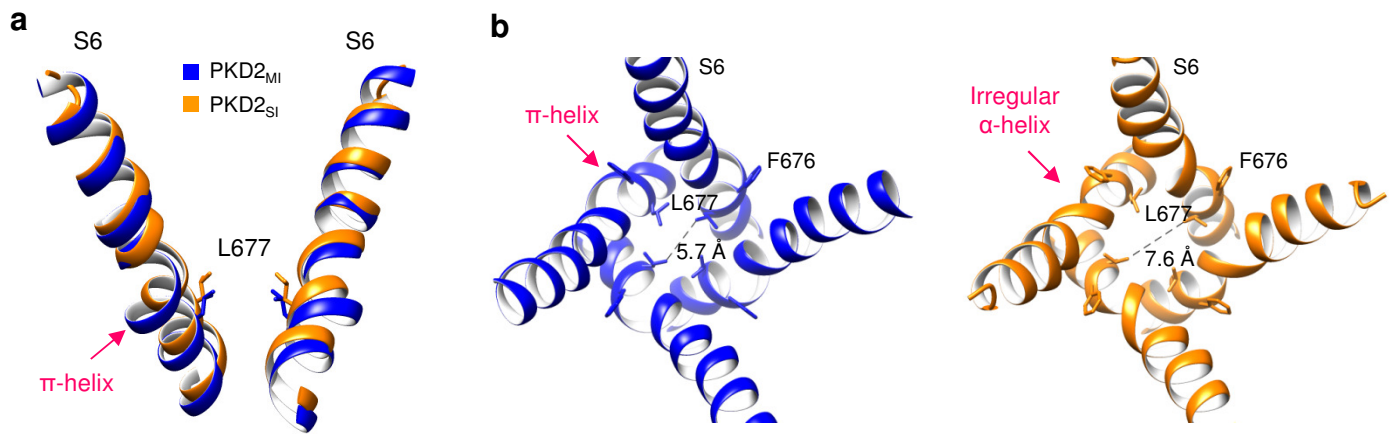

**Supplementary Figure 11. Conformational changes in pore-lining S6 helix of PKD2 induced by Ca<sup>2+</sup>.** **a** Side view of superposition of S6 in the PKD2<sub>MI</sub> (bound with multiple Ca<sup>2+</sup> ions, PDB: 5MKF, blue) and PKD2<sub>SI</sub> (bound with single Ca<sup>2+</sup> ion, PDB: 5MKE, orange). The  $\pi$ -helix in the PKD2<sub>MI</sub> structure is indicated by an arrow. The gate residue L677 is shown. **b** Top view of the pore lined by S6 in the PKD2<sub>MI</sub> and PKD2<sub>SI</sub> structures showing local conformational changes in the middle of S6.

Figure 1e

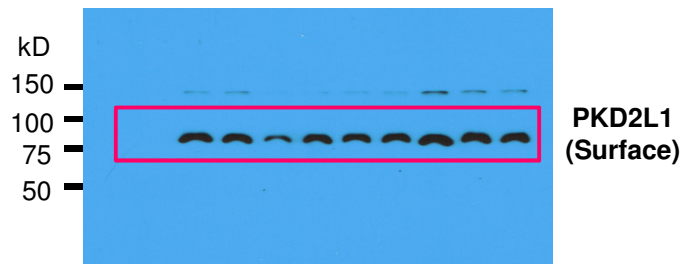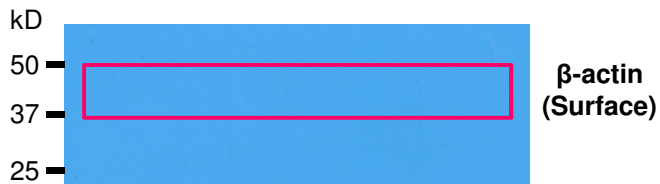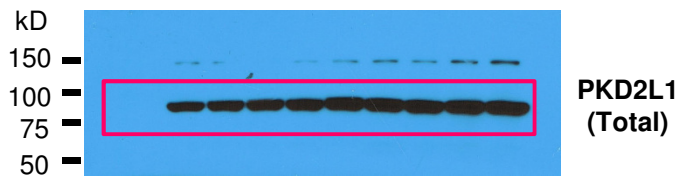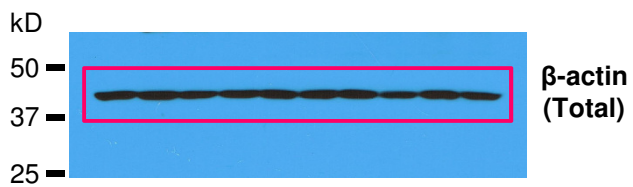

Figure 2e

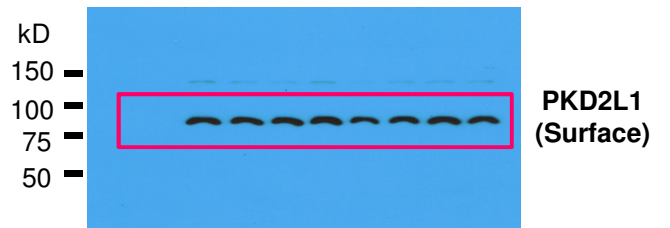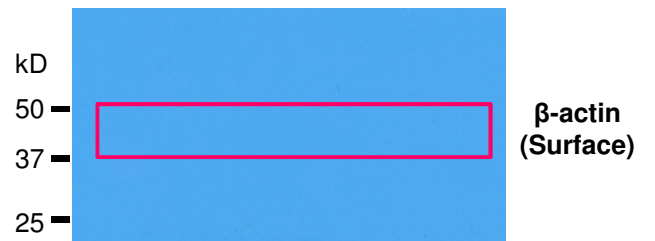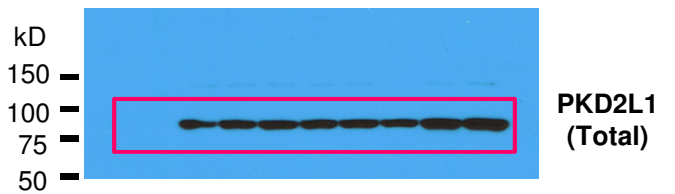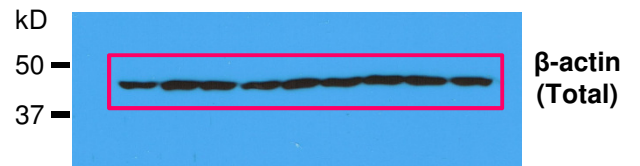

**Supplementary Figure 12. Uncropped images of the original scans of immunoblots.**

Uncropped, full-size scans of immunoblots shown in Fig. 1e and Fig. 2e.

Figure 3c

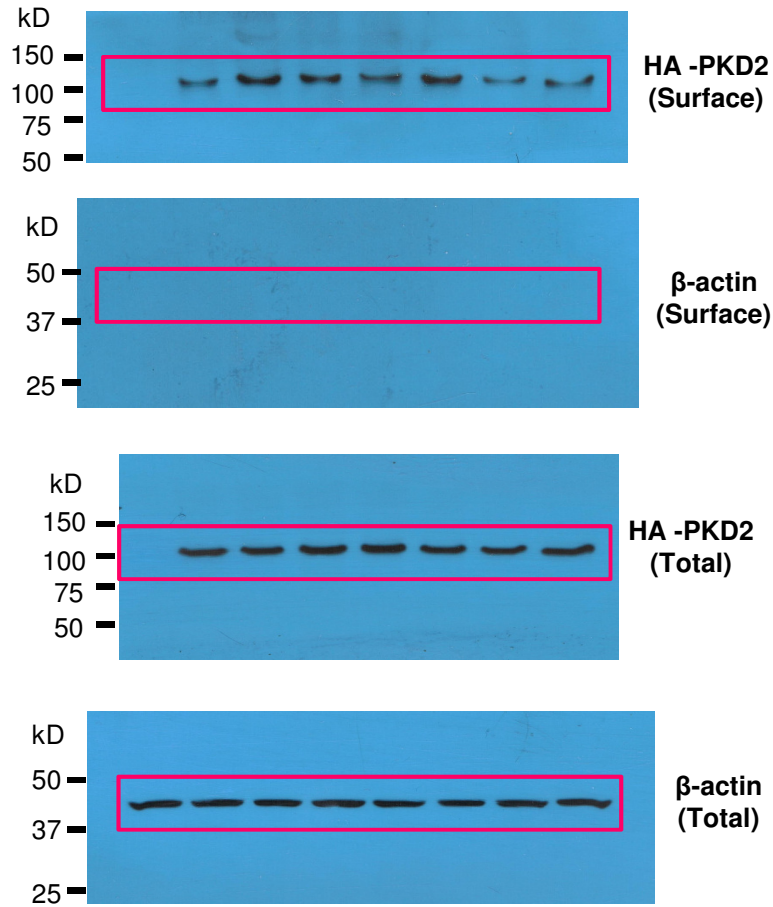

Figure 3d

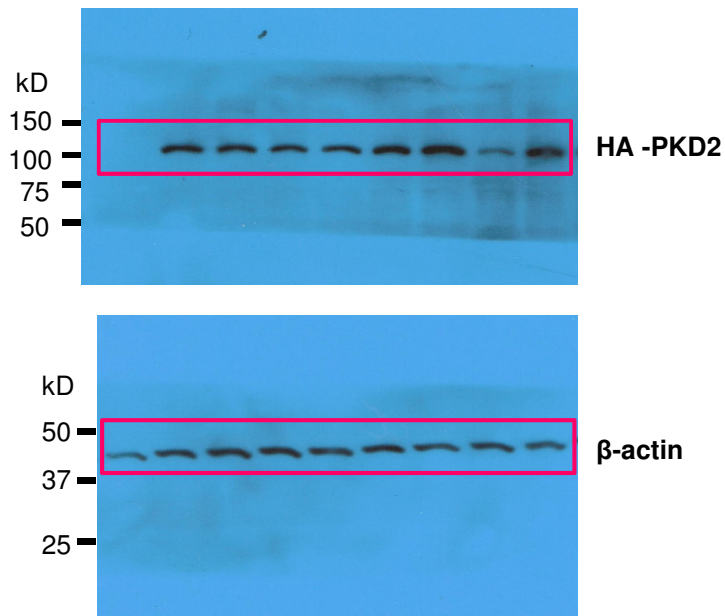

**Supplementary Figure 13. Uncropped images of the original scans of immunoblots.**  
Uncropped, full-size scans of immunoblots shown in Fig. 3c and d.

**Supplementary Table 1. Cryo-EM data collection, refinement and validation statistics**

|                                                   |             |
|---------------------------------------------------|-------------|
| PKD2 F604P<br>(EMDB-7786)<br>(PDB-6D1W)           |             |
| <b>Data collection/Processing</b>                 |             |
| Voltage (kV)                                      | 300         |
| Magnification                                     | 41,132      |
| Defocus range ( $\mu\text{m}$ )                   | -0.6 – -2.4 |
| Pixel size ( $\text{\AA}$ )                       | 1.2156      |
| Total electron dose ( $\text{e}^-/\text{\AA}^2$ ) | 80          |
| Exposure time (s)                                 | 16          |
| Number of images                                  | 1,992       |
| Number of frames per image                        | 80          |
| Initial particle number                           | 661,905     |
| Final particle number                             | 387,454     |
| Resolution (unmasked, $\text{\AA}$ )              | 3.8         |
| Resolution (masked, $\text{\AA}$ )                | 3.5         |
| <b>Refinement and Validation</b>                  |             |
| Number of atoms                                   | 14,452      |
| R.M.S deviation                                   |             |
| Bond length ( $\text{\AA}$ )                      | 0.008       |
| Bond angles ( $^\circ$ )                          | 0.794       |
| Ramachandran                                      |             |
| Favored (%)                                       | 93.3%       |
| Allowed (%)                                       | 6.5%        |
| Outlier (%)                                       | 0.2%        |
| Molprobrity score                                 | 2.20        |



**Supplementary Table 2. Primers used in this study**

| Mutation      | Direction   | Primer (5'-3')                        |
|---------------|-------------|---------------------------------------|
| <b>PKD2L1</b> |             |                                       |
| L552N         | Forward (F) | CGTCTTCTTCGTGAACCTGAACATGTTCC         |
|               | Reverse (R) | GGAACATGTTTCAGGTTACGAAGAAGACG         |
| L553N         | F           | GTCTTCTTCGTGCTCAATAACATGTTCTGTC       |
|               | R           | GCCAGGAACATGTTATTGAGCACGAAGAAGAC      |
| M555N         | F           | CGTGCTCCTGAACAATTTCTGGCCATCATC        |
|               | R           | GATGATGGCCAGGAAATTGTTTCAGGAGCACG      |
| F556N         | F           | GTCCTGAACATGAACCTGGCCATCATCAA         |
|               | R           | TTGATGATGGCCAGGTTTCATGTTTCAGGAGC      |
| L557N         | F           | GTCCTGAACATGTTCAATGCCATCATCAATGACAC   |
|               | R           | GTGTCATTGATGATGGCATTGAACATGTTTCAGGAGC |
| A558N         | F           | GAACATGTTCTGAACATCATCAATGACAC         |
|               | R           | GTGTCATTGATGATGTTTCAGGAACATGTTTC      |
| I559N         | F           | GTTCTGGCCAACATCAATGACACATATTC         |
|               | R           | GAATATGTGTCATTGATGTTGGCCAGGAAC        |
| I560N         | F           | CCTGGCCATCAACAATGACACATATTC           |
|               | R           | GAATATGTGTCATTGTTGATGGCCAGG           |
| L557E         | F           | GTCCTGAACATGTTTCGAGGCCATCATCAATGACAC  |
|               | R           | GTGTCATTGATGATGGCCTCGAACATGTTTCAGGAGC |
| L557D         | F           | GTCCTGAACATGTTTCGATGCCATCATCAATGACAC  |
|               | R           | GTGTCATTGATGATGGCATCGAACATGTTTCAGGAGC |
| L557Q         | F           | GTCCTGAACATGTTCCAGGCCATCATCAATGACAC   |
|               | R           | GTGTCATTGATGATGGCCTGGAACATGTTTCAGGAGC |
| L557S         | F           | GTCCTGAACATGTTTCAGTGCCATCATCAATGACAC  |
|               | R           | GTGTCATTGATGATGGCACTGAACATGTTTCAGGAGC |
| L557C         | F           | GTCCTGAACATGTTCTGTGCCATCATCAATGACAC   |
|               | R           | GTGTCATTGATGATGGCACAGAACATGTTTCAGGAGC |
| L557T         | F           | GTCCTGAACATGTTTCACGGCCATCATCAATGACAC  |
|               | R           | GTGTCATTGATGATGGCCGTGAACATGTTTCAGGAGC |
| L557G         | F           | GTCCTGAACATGTTTCGGGGCCATCATCAATGACAC  |
|               | R           | GTGTCATTGATGATGGCCCCGAACATGTTTCAGGAGC |
| L557A         | F           | GTCCTGAACATGTTTCGCGGCCATCATCAATGACAC  |
|               | R           | GTGTCATTGATGATGGCCGCGAACATGTTTCAGGAGC |
| L557V         | F           | GTCCTGAACATGTTTCGTGGCCATCATCAATGACAC  |
|               | R           | GTGTCATTGATGATGGCCACGAACATGTTTCAGGAGC |
| L557I         | F           | GTCCTGAACATGTTTCATTGCCATCATCAATGACAC  |
|               | R           | GTGTCATTGATGATGGCAATGAACATGTTTCAGGAGC |
| L557F         | F           | GTCCTGAACATGTTCTTTGCCATCATCAATGACAC   |
|               | R           | GTGTCATTGATGATGGCAAAGAACATGTTTCAGGAGC |
| L557W         | F           | GTCCTGAACATGTTCTGGGCCATCATCAATGACAC   |
|               | R           | GTGTCATTGATGATGGCCCAGAACATGTTTCAGGAGC |
| A558Q         | F           | GAACATGTTCTGCAAATCATCAATGACAC         |
|               | R           | GTGTCATTGATGATTTGCAGGAACATGTTTC       |
| A558S         | F           | GAACATGTTCTGTCCATCATCAATGACAC         |
|               | R           | GTGTCATTGATGATGGACAGGAACATGTTTC       |

|             |   |                                         |
|-------------|---|-----------------------------------------|
| A558C       | F | GAACATGTTCCCTGTGCATCATCAATGACAC         |
|             | R | GTGTCATTGATGATGCACAGGAACATGTTC          |
| A558T       | F | GAACATGTTCCCTGACCATCATCAATGACAC         |
|             | R | GTGTCATTGATGATGGTCAGGAACATGTTC          |
| A558G       | F | GAACATGTTCCCTGGGCATCATCAATGACAC         |
|             | R | GTGTCATTGATGATGCCCAGGAACATGTTC          |
| A558V       | F | GAACATGTTCCCTGGTCATCATCAATGACAC         |
|             | R | GTGTCATTGATGATGACCAGGAACATGTTC          |
| A558I       | F | GAACATGTTCCCTGATCATCATCAATGACAC         |
|             | R | GTGTCATTGATGATGATCAGGAACATGTTC          |
| A558L       | F | GAACATGTTCCCTGCTCATCATCAATGACAC         |
|             | R | GTGTCATTGATGATGAGCAGGAACATGTTC          |
| A558F       | F | GAACATGTTCCCTGTTTCATCATCAATGACAC        |
|             | R | GTGTCATTGATGATGAACAGGAACATGTTC          |
| A558W       | F | GAACATGTTCCCTGTGGATCATCAATGACAC         |
|             | R | GTGTCATTGATGATCCACAGGAACATGTTC          |
| L557W/A558N | F | CCTGAACATGTTCTGGAACATCATCAATGACAC       |
|             | R | GTGTCATTGATGATGTTCCAGAACATGTTTCAGG      |
| A558W/L557N | F | CCTGAACATGTTCAACTGGATCATCAATGACAC       |
|             | R | GTGTCATTGATGATCCAGTTGAACATGTTTCAGG      |
| K461A       | F | CATCAGCTTCAACGCAACCATGACCCAG            |
|             | R | CTGGGTCATGGTTGCGTTGAAGCTGATG            |
| <b>PKD2</b> |   |                                         |
| F676N       | F | CTTCATTCTTTTGAATATGAATTTGGCTATCATCAATG  |
|             | R | CATTGATGATAGCCAAATTCATATTCAAAAGAATGAAG  |
| L677N       | F | CATTCTTTTGAATATGTTTAATGCTATCATCAATGATAC |
|             | R | GTATCATTGATGATAGCATTAAACATATTCAAAAGAATG |
| A678N       | F | CTTTTGAATATGTTTTTGAATATCATCAATGATACTTAC |
|             | R | GTAAGTATCATTGATGATATTCAAAACATATTCAAAAG  |
| I679N       | F | GAATATGTTTTTGGCTAACATCAATGATACTTAC      |
|             | R | GTAAGTATCATTGATGTTAGCCAAAACATATTC       |
| A678Q       | F | CTTTTGAATATGTTTTTGCAAATCATCAATGATACTTAC |
|             | R | GTAAGTATCATTGATGATTTTGCAAACATATTCAAAAG  |
| A678S       | F | CTTTTGAATATGTTTTTGCTATCATCAATGATACTTAC  |
|             | R | GTAAGTATCATTGATGATAGACAAAACATATTCAAAAG  |
| A678T       | F | CTTTTGAATATGTTTTTGACTATCATCAATGATACTTAC |
|             | R | GTAAGTATCATTGATGATAGTCAAAAACATATTCAAAAG |
| L677G       | F | CATTCTTTTGAATATGTTTGGGGCTATCATCAATGATAC |
|             | R | GTATCATTGATGATAGCCCAAACATATTCAAAAGAATG  |
| L677A       | F | CATTCTTTTGAATATGTTTGCGGCTATCATCAATGATAC |
|             | R | GTATCATTGATGATAGCCGCAAACATATTCAAAAGAATG |
| L677F       | F | CATTCTTTTGAATATGTTTTTGGCTATCATCAATGATAC |
|             | R | GTATCATTGATGATAGCAAACATATTCAAAAGAATG    |
| L677Y       | F | CATTCTTTTGAATATGTTTTACGCTATCATCAATGATAC |
|             | R | GTATCATTGATGATAGCGTAAAACATATTCAAAAGAATG |
| L677W       | F | CATTCTTTTGAATATGTTTTGGGCTATCATCAATGATAC |
|             | R | GTATCATTGATGATAGCCCAAACATATTCAAAAGAATG  |
| W201A       | F | GGCTGCGAGGTCTCGCGGGAACAAGACTCATG        |
|             | R | CATGAGTCTTGTTCGCGGAGACCTCGCAGCC         |

|                 |   |                                            |
|-----------------|---|--------------------------------------------|
| K688A           | F | CTTACTCTGAAGTGGCATCTGACTTGGC               |
|                 | R | GCCAAGTCAGATGCCACTTCAGAGTAAG               |
| D511V           | F | GTTTCTGGAATTGTCTGGTTGTTGTGATCGTTGTGC       |
|                 | R | GCACAACGATCACAACAACCAGACAATTCCAGAAAC       |
| ΔY684           | F | CTATCATCAATGATACTTCTGAAGTGAAATCTGACT       |
|                 | R | AGTCAGATTTCACTTCAGAAGTATCATTGATGATAG       |
| Y684A           | F | CTATCATCAATGATACTGCCTCTGAAGTGAAATCTGACT    |
|                 | R | AGTCAGATTTCACTTCAGAGGCAGTATCATTGATGATAG    |
| L677N/N68<br>1L | F | GTTTATTGCTATCATCCTTGATACTTACTCTG           |
|                 | R | CAGAGTAAGTATCAAGGATGATAGCAATAAAC           |
| R581A           | F | CAAATTCATCAATTTTAACGCGACCATGAGCCAG         |
|                 | R | CTGGCTCATGGTCGCGTTAAAATTGATGAATTTG         |
| F676G           | F | CTTCATTCTTTTGAATATGGGTTTGGCTATCATCAATG     |
|                 | R | CATTGATGATAGCCAAACCCATATTCAAAGAATGAAG      |
| F676A           | F | CTTCATTCTTTTGAATATGGCTTTGGCTATCATCAATG     |
|                 | R | CATTGATGATAGCCAAAGCCATATTCAAAGAATGAAG      |
| F676Y           | F | CTTCATTCTTTTGAATATGTATTTGGCTATCATCAATG     |
|                 | R | CATTGATGATAGCCAAATACATATTCAAAGAATGAAG      |
| F676W           | F | CTTCATTCTTTTGAATATGTGGTTGGCTATCATCAATGATAC |
|                 | R | GTATCATTGATGATAGCCAACCACATATTCAAAGAATGAAG  |
| L677N/F67<br>6G | F | CTTCATTCTTTTGAATATGGGTAACGCTATCATCAATG     |
|                 | R | CATTGATGATAGCGTTACCCATATTCAAAGAATGAAG      |
| L677N/F67<br>6A | F | CTTCATTCTTTTGAATATGGCTAACGCTATCATCAATG     |
|                 | R | CATTGATGATAGCGTTAGCCATATTCAAAGAATGAAG      |
| L677N/F67<br>6Y | F | CTTCATTCTTTTGAATATGTATAACGCTATCATCAATG     |
|                 | R | CATTGATGATAGCGTTATACATATTCAAAGAATGAAG      |
| L677N/F67<br>6W | F | CTTCATTCTTTTGAATATGTGGAACGCTATCATCAATG     |
|                 | R | CATTGATGATAGCGTTCCACATATTCAAAGAATGAAG      |
